# Supplementary material for: Comparative Study of the Structural Features and Electrochemical Properties of Nitrogen-Containing Multi-Walled Carbon Nanotubes after Ion-Beam Irradiation and Hydrochloric Acid Treatment
Source: MDPI journal article supplement (doi:10.3390/nano11092163), 2021-08-24
Supplement: s1 [file s1]

# Comparative Study of the Structural Features and Electrochemical Properties of Nitrogen-Containing Multi-Walled Carbon Nanotubes after Ion-Beam Irradiation and Hydrochloric Acid Treatment

Petr M. Korusenko <sup>1,2,\*</sup>, Sergey N. Nesov <sup>2,3</sup>, Anna A. Iurchenkova <sup>4,5</sup>, Ekaterina O. Fedorovskaya <sup>5</sup>, Valery V. Bolotov <sup>3</sup>, Sergey N. Povoroznyuk <sup>3</sup>, Dmitry A. Smirnov <sup>6</sup> and Alexander S. Vinogradov <sup>1</sup>

<sup>1</sup> Department of Solid State Electronics, St. Petersburg State University, 7/9 Universitetskaya nab., 199034 Saint Petersburg, Russia; asvinograd@yahoo.de

<sup>2</sup> Department of Physics, Omsk State Technical University, 11 Mira prosp., 644050 Omsk, Russia; nesov@obisp.oscsbras.ru

<sup>3</sup> Laboratory of Physics of Nanomaterials and Heterostructures, Omsk Scientific Center of SB RAS, 15 Karl Marx prosp., 644024 Omsk, Russia; bolotov@obisp.oscsbras.ru (V.V.B.); povorozn@obisp.oscsbras.ru (S.N.P.)

<sup>4</sup> Laboratory of Hybrid Materials for Electrochemical Storage Devices, Department of Natural Science, Novosibirsk State University, 2 Pirogova ul., 630090 Novosibirsk, Russia; anna.yurchenkova@yandex.ru

<sup>5</sup> Research Group of Electrochemical Energy Conversion and Storage, Department of Chemistry, School of Chemical Engineering, Aalto University, P.O. Box 16100, FI-00076 Aalto, Finland; fedorovskaya.eo@yandex.ru

<sup>6</sup> Institute of Solid State Physics, Dresden University of Technology, D-01069 Dresden, Germany; wnmw@ya.ru

\* Correspondence: korusenko\_petr@mail.ru

## Abbreviations and parameters

N-MWCNTs – nitrogen-containing multi-walled carbon nanotubes

PE – photoemission

$\varphi$  – ion beam fluence value

$h\nu$  – exciting photon energy

## TEM data

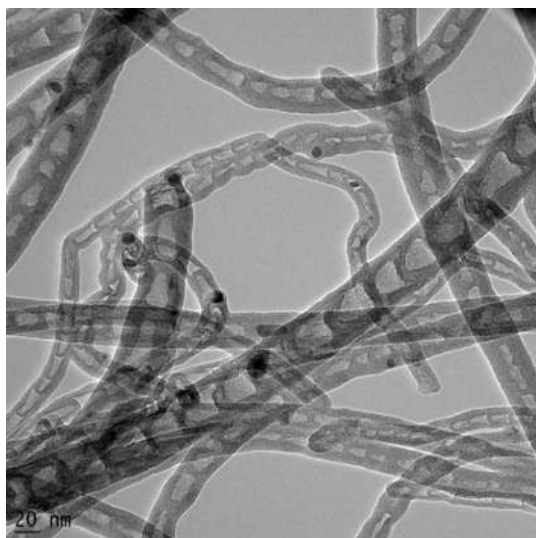

(a)

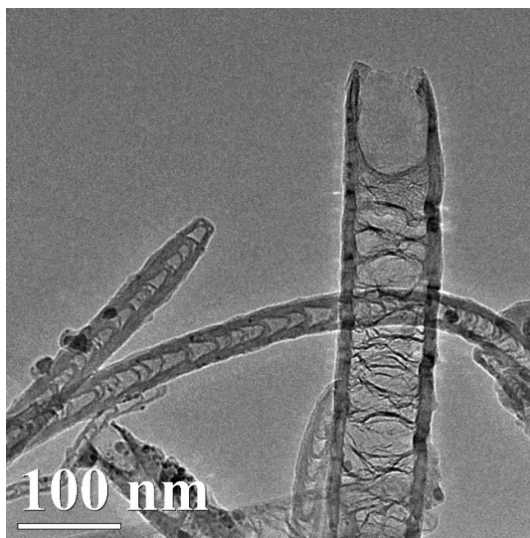

(b)

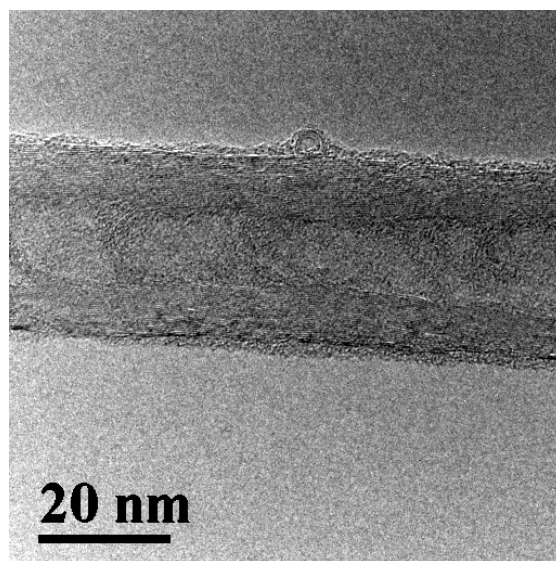

(c)

**Figure S1.** TEM images of as-prepared N-MWCNTs (a) and after treatment in HCl (b) as well as after irradiation by ion beam with  $\phi_2 = 5.5 \times 10^{16} \text{ ion}\cdot\text{cm}^{-2}$  (c).

## Raman spectroscopy

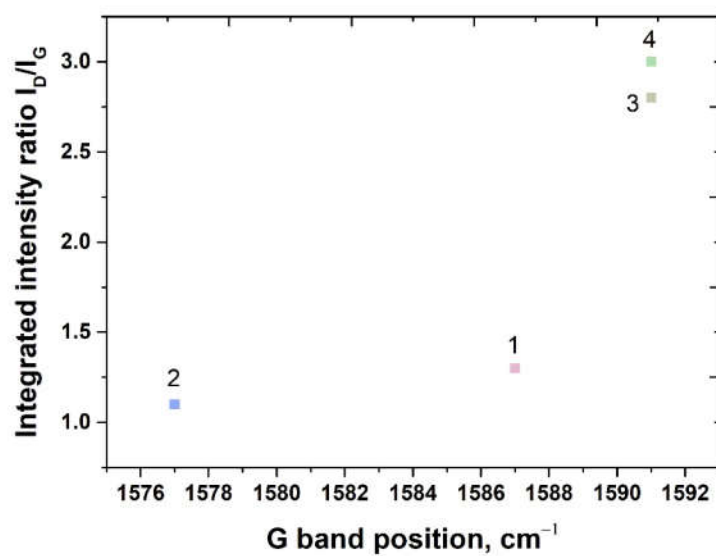

**Figure S2.** The G band position vs.  $I_D/I_G$  ratio for N-MWCNTs before and after treatments: 1 – initial; 2 – after HCl; 3 – after irradiation by ion beam with  $\varphi_1=1.2 \times 10^{16} \text{ ion}\cdot\text{cm}^{-2}$ ; 4 – after irradiation by ion beam with  $\varphi_2=5.5 \times 10^{16} \text{ ion}\cdot\text{cm}^{-2}$ .

## X-ray photoelectron spectroscopy

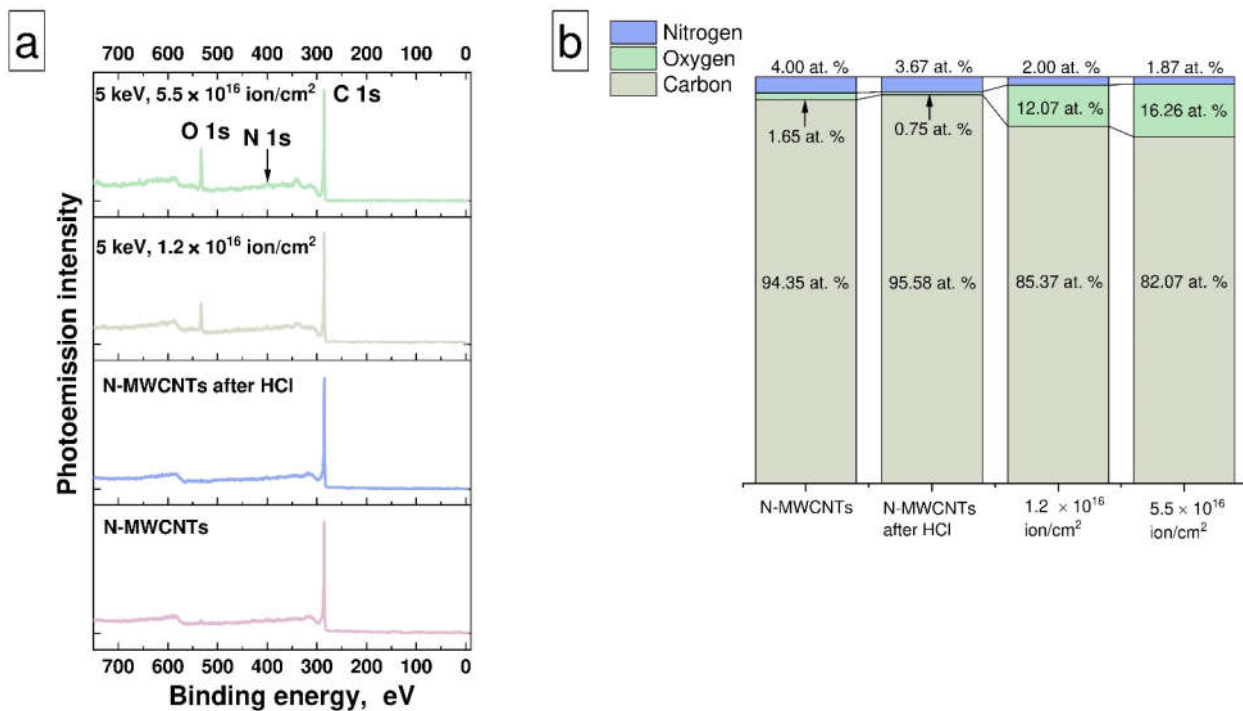

**Figure S3.** (a) Survey PE spectra of N-MWCNTs before and after treatments ( $h\nu=850$  eV); (b) diagram of atomic concentration from XPS survey spectra for samples.

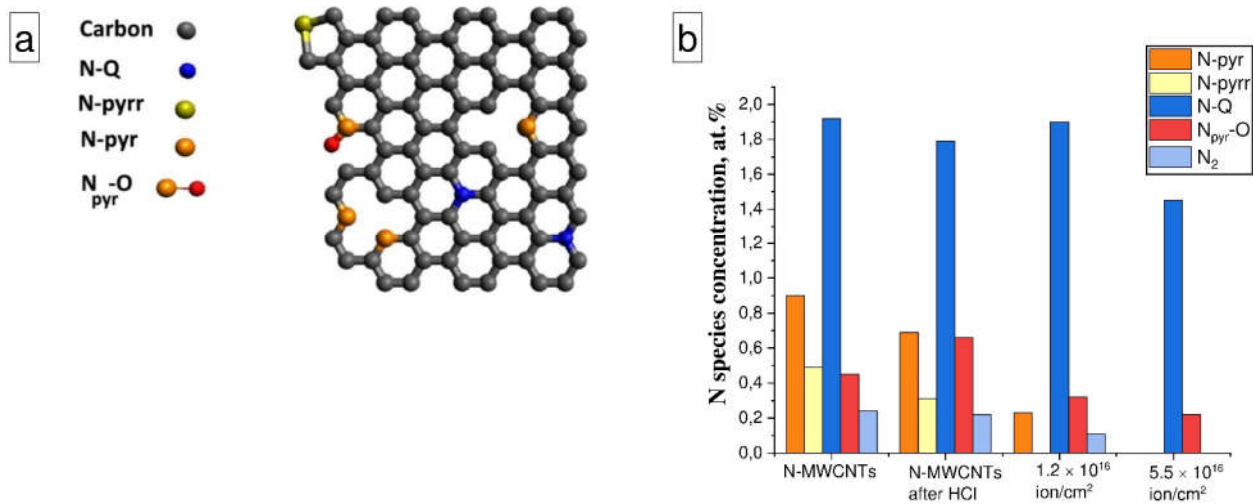

**Figure S4.** (a) Types of nitrogen inclusions in the hexagonal lattice of graphene; (b) the distribution of the concentrations of various nitrogen inclusions in N-MWCNTs before and after various treatments.

## Electrochemical data obtained in 1M H<sub>2</sub>SO<sub>4</sub> electrolyte

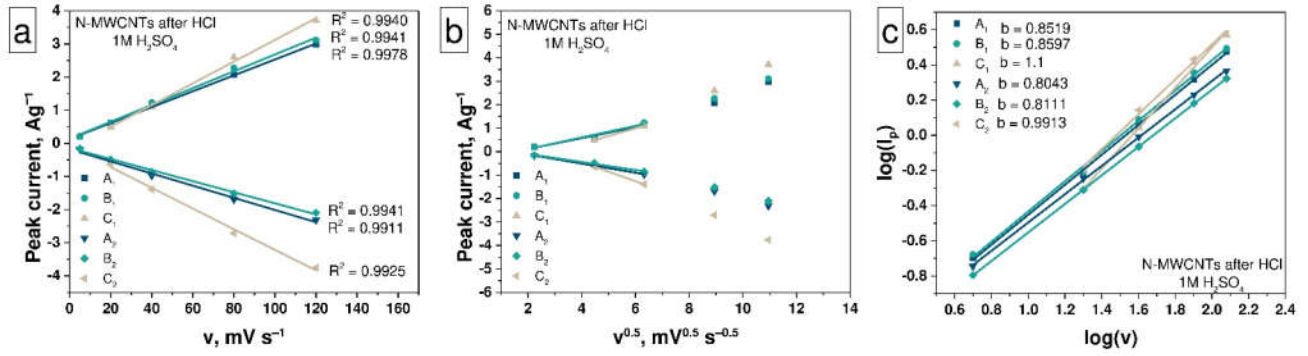

**Figure S5.** (a) Scan rate and (b) square root of scan rate vs peak current and (c) log of scan rate vs log of peak current plots for N-MWCNTs after HCl.

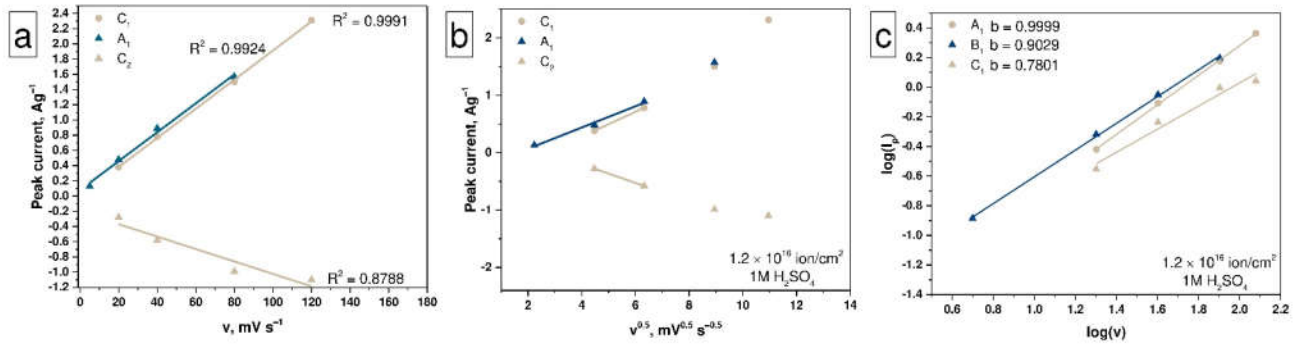

**Figure S6.** (a) Scan rate and (b) square root of scan rate vs peak current and (c) log of scan rate vs log of peak current plots for N-MWCNTs irradiated by ion beam with  $\phi_1 = 1.2 \times 10^{16} \text{ ion/cm}^2$ .

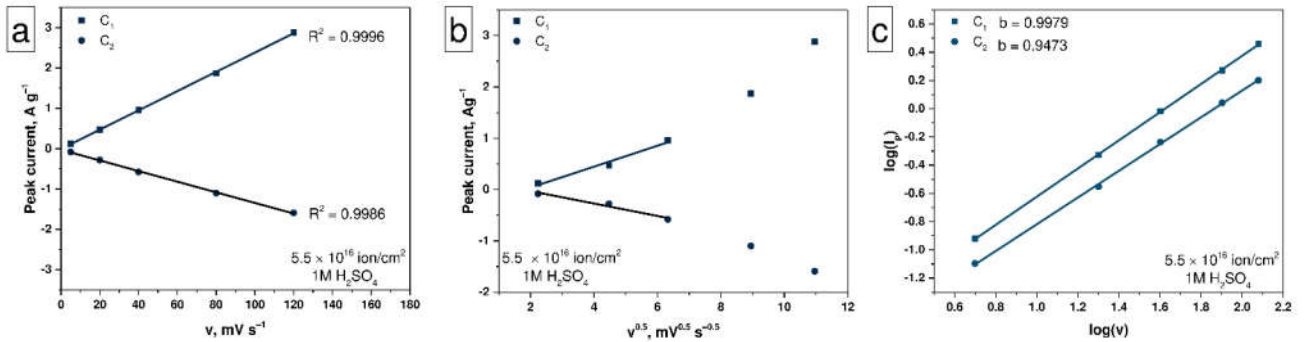

**Figure S7.** (a) Scan rate and (b) square root of scan rate vs peak current and (c) log of scan rate vs. log of peak current plots for N-MWCNTs irradiated by ion beam with  $\phi_2 = 5.5 \times 10^{16} \text{ ion/cm}^2$ .

## Electrochemical and Raman data

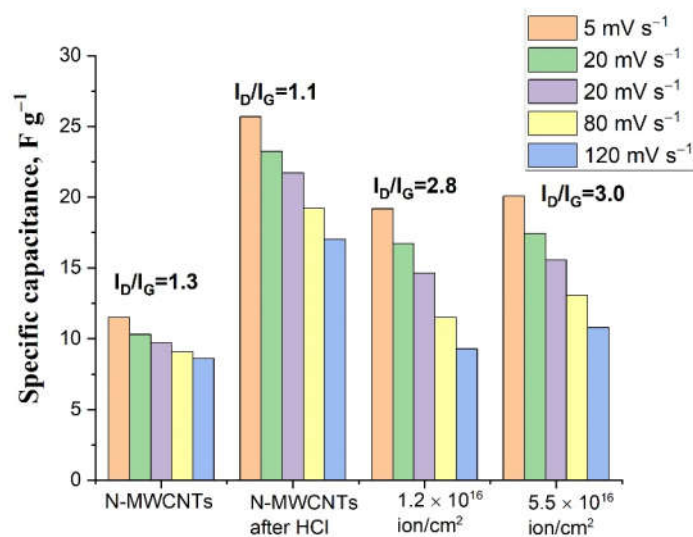

**Figure S8.** The diagram of the specific capacitance of nanotubes vs. their degree of defectiveness from the data of electrochemical measurements and Raman studies.
